# Supplementary material for: Automatic Rice Early-Season Mapping Based on Simple Non-Iterative Clustering and Multi-Source Remote Sensing Images
Source: MDPI journal article supplement (doi:10.3390/rs16020277), 2024-01-10
Supplement: s1 [file s1]

# Automatic rice early season mapping based on SNIC and multi-source remote sensing images

Gengze Wang <sup>1,2</sup>, Di Meng <sup>3</sup>, Riqiang Chen <sup>1,2</sup>, Guijun Yang <sup>1,2</sup>, Laigang Wang <sup>4</sup>, Hailiang Jin <sup>3</sup>, Xiaosan Ge <sup>3</sup> and Haikuan Feng <sup>1,2,5,\*</sup>

<sup>1</sup> Key Laboratory of Quantitative Remote Sensing in Agriculture of Ministry of Agriculture and Rural Affairs, Information Technology Research Center, Beijing Academy of Agriculture and Forestry Sciences, Beijing 100097, China

<sup>2</sup> National Engineering Research Center for Information Technology in Agriculture, Beijing 100097, China

<sup>3</sup> School of Surveying and Land Information Engineering, Henan Polytechnic University, Jiaozuo, China

<sup>4</sup> Institute of Agricultural Information Technology, Henan Academy of Agricultural Sciences, Zhengzhou, China

<sup>5</sup> College of Agriculture, Nanjing Agricultural University, Nanjing, Jiangsu 210095, China

\* Correspondence: Correspondence: fenghk@nercita.org.cn

## Supplementary Materials

**Table S1.** OA, UA, PA, Kappa, and F1 scores of rice classification based on SNIC and pixel under SAR+SI data source at different time intervals in the SART3 time stage.

| SART3    |        | SNIC   |        |        |        |        | Pixel  |        |        |        |
|----------|--------|--------|--------|--------|--------|--------|--------|--------|--------|--------|
| End date | UA     | PA     | OA     | Kappa  | F1     | UA     | PA     | OA     | Kappa  | F1     |
| 15-Jun   | 0.8749 | 0.5937 | 0.7322 | 0.4768 | 0.7073 | 0.8074 | 0.5066 | 0.6652 | 0.3489 | 0.6225 |
| 30-Jun   | 0.9749 | 0.7232 | 0.839  | 0.6834 | 0.8304 | 0.8793 | 0.5986 | 0.7364 | 0.4848 | 0.7123 |
| 15-Jul   | 0.9885 | 0.7731 | 0.8714 | 0.7462 | 0.8676 | 0.9246 | 0.7007 | 0.8057 | 0.6174 | 0.7972 |
| 31-Jul   | 0.9909 | 0.7933 | 0.8833 | 0.7693 | 0.8811 | 0.9531 | 0.7494 | 0.8433 | 0.6906 | 0.8391 |
| 15-Aug   | 0.9975 | 0.8268 | 0.9045 | 0.8106 | 0.9042 | 0.9710 | 0.7948 | 0.8752 | 0.7528 | 0.8741 |
| 31-Aug   | 0.9938 | 0.8427 | 0.9114 | 0.8240 | 0.9120 | 0.9723 | 0.8116 | 0.8847 | 0.7712 | 0.8847 |
| 15-Sep   | 0.9921 | 0.8525 | 0.9159 | 0.8328 | 0.9170 | 0.9707 | 0.8246 | 0.8908 | 0.7831 | 0.8917 |
| 30-Sep   | 0.9901 | 0.8600 | 0.9190 | 0.8388 | 0.9205 | 0.9692 | 0.8305 | 0.8932 | 0.7877 | 0.8945 |

**Table S2.** OA, UA, PA, Kappa, and F1 scores of rice classification based on SNIC and pixel under SAR data source at different time intervals in the SART3 time stage.

| SART3    |        | SNIC   |        |        |        |        | Pixel  |        |        |        |
|----------|--------|--------|--------|--------|--------|--------|--------|--------|--------|--------|
| End date | UA     | PA     | OA     | Kappa  | F1     | UA     | PA     | OA     | Kappa  | F1     |
| 15-Jun   | 0.8543 | 0.5878 | 0.7207 | 0.4537 | 0.6964 | 0.7837 | 0.4894 | 0.6481 | 0.3158 | 0.6026 |
| 30-Jun   | 0.959  | 0.7212 | 0.8312 | 0.6679 | 0.8233 | 0.8624 | 0.5875 | 0.7241 | 0.4607 | 0.6989 |
| 15-Jul   | 0.9739 | 0.774  | 0.8655 | 0.7342 | 0.8625 | 0.9108 | 0.6899 | 0.7942 | 0.5947 | 0.7851 |
| 31-Jul   | 0.9758 | 0.795  | 0.8775 | 0.7575 | 0.8762 | 0.9394 | 0.7429 | 0.8338 | 0.6716 | 0.823  |
| 15-Aug   | 0.9657 | 0.8317 | 0.8922 | 0.7855 | 0.8937 | 0.9554 | 0.7914 | 0.8661 | 0.7346 | 0.8657 |
| 31-Aug   | 0.972  | 0.8441 | 0.9018 | 0.8044 | 0.9035 | 0.9562 | 0.8074 | 0.8748 | 0.7515 | 0.8755 |
| 15-Sep   | 0.9709 | 0.8615 | 0.9104 | 0.8214 | 0.9129 | 0.9535 | 0.8200 | 0.8800 | 0.7614 | 0.8817 |
| 30-Sep   | 0.97   | 0.8661 | 0.9124 | 0.8252 | 0.9151 | 0.9496 | 0.8275 | 0.8820 | 0.7650 | 0.8843 |

**Table S3.** Glossary of full-text abbreviations.

| Full name                                  | Abbrevia-<br>tion | Full name                                                                                                                                | Abbreviation      |
|--------------------------------------------|-------------------|------------------------------------------------------------------------------------------------------------------------------------------|-------------------|
| Synthetic aperture radar                   | SAR               | the slope of VH backscattering intensity                                                                                                 | VH-slope          |
| land cover types                           | LCTs              | Flooding signal vegetation index                                                                                                         | FSVI              |
| Whittaker Smoother                         | WS                | European Space Agency World Cover 10 m 2020 product                                                                                      | ESAWC2020         |
| Google Earth Engine                        | GEE               | Sowing/Transplanting date                                                                                                                | ST                |
| Xuan's crop mapping datasets (30 m)        | XCP               | Transplanting/Mature date                                                                                                                | MT                |
| You's crop mapping datasets (10 m)         | YCP               | non-standard rice time series curve                                                                                                      | NSR               |
| overall accuracy                           | OA                | standard rice time series curve                                                                                                          | SR                |
| Spectral index                             | SI                | SI weight overlap map                                                                                                                    | SI-W              |
| Jeffries–Matusita                          | JM                | the cumulative sum of VH backscattering intensity                                                                                        | VH-sum            |
| Normalized difference vegetation index     | NDVI              | SAR time;start:16-May,end:30-Sep                                                                                                         | SART2             |
| Enhanced vegetation index                  | EVI               | SAR time;start:1-Jun,end:30-Sep                                                                                                          | SART3             |
| Normalized difference water index          | NDWI              | Spectral index time                                                                                                                      | SIT               |
| Modified normalized difference water index | MNDWI             | median synthesis of MBWI                                                                                                                 | MBWI-median       |
| Land surface water index                   | LSWI              | maximum composite value of FSVI at SIT5                                                                                                  | FSVI-max-SIT5     |
| Double Logistic function                   | DL                | average composite value of FSVI at SIT5                                                                                                  | FSVI-mean-SIT5    |
| Simple Non-Iterative Clustering            | SNIC              | median composite value of FSVI at SIT5                                                                                                   | FSVI-median-SIT5  |
| Savitzky–Golay                             | SG                | weighted overlapped value of FSVI                                                                                                        | FSVI-W            |
| Harmonic Analysis of Time Series           | HANTS             | maximum value synthesis of MNDWI at SIT5                                                                                                 | MNDWI-max-SIT5    |
| Multispectral Instrument                   | MSI               | average value synthesis of MNDWI at SIT5                                                                                                 | MNDWI-mean-SIT5   |
| Enhanced Theme Imager                      | ETM+              | median synthesis of MNDWI at SIT5                                                                                                        | MNDWI-median-SIT5 |
| producer accuracy                          | PA                | weight overlap addition value of MNDWI                                                                                                   | MNDWI-W           |
| user accuracy                              | UA                | a hierarchical K-Means binary classification rice automatic identification method based on phenological information feature optimization | PFO-HKMAR         |
| kappa coefficient                          | KC                | Automated Rice Mapping using Synthetic Aperture Radar Flooding Signals                                                                   | ARM-SARFS         |
| European Space Agency                      | ESA               |                                                                                                                                          |                   |

**Table S4.** Detailed steps of hierarchical K-Means binary classification method.

| Step   | Detailed methods                                                                                                                                                                                                                                                                                                                                                                                                                     |
|--------|--------------------------------------------------------------------------------------------------------------------------------------------------------------------------------------------------------------------------------------------------------------------------------------------------------------------------------------------------------------------------------------------------------------------------------------|
| Step 1 | K=2; select VH-sum and SI-W features and perform K-Means secondary classification. Considering the memory limitations in Google Earth Engine (GEE), 3000 sample points were randomly selected to train the centroids of the two clusters. According to the performance of different land cover types in VH-sum and SI-W features, 3000 sample points were randomly generated on the cultivated land layer of the ESAWC2020 data set. |

---

Step 2      Then,  $K=2$ ; select the VH-slope feature, and perform K-Means binary classification. Randomly select 3000 sample points to train the centroids of the two clusters. Considering the balance of sample categories, 1500 sample points are randomly generated on the permanent water body layer of the ESAWC2020 data set, and 1500 sample points are randomly generated after masking the permanent water body on the above classification results.

---
